# Supplementary material
Source: HighWire-hosted journal article supplement (https://erj.ersjournals.com/content/55/6/1902056)
Supplement: inline-supplementary-material-2 [file inline-supplementary-material-2.pdf]

| <b>AQI VALUE</b>                                          | <b>Actions to protect one's health from PM<sub>2.5</sub> (World AQI, 2019)</b>                                                                                                                        | <b>Actions to protect one's health from ozone (EPA AQI, 2014)</b>                                                                                                                                                                |
|-----------------------------------------------------------|-------------------------------------------------------------------------------------------------------------------------------------------------------------------------------------------------------|----------------------------------------------------------------------------------------------------------------------------------------------------------------------------------------------------------------------------------|
| <b>GOOD</b><br><b>[0–50]</b>                              | None                                                                                                                                                                                                  | None                                                                                                                                                                                                                             |
| <b>Moderate</b><br><b>[51–100*]</b>                       | Active children and adults, and people with respiratory disease, such as asthma, should limit prolonged outdoor exertion                                                                              | Unusually sensitive people should consider reducing prolonged or heavy exertion                                                                                                                                                  |
| <b>Unhealthy for sensitive groups</b><br><b>[101–150]</b> | Active children and adults, and people with respiratory disease, such as asthma, should limit prolonged outdoor exertion                                                                              | The following groups should reduce prolonged or heavy outdoor exertion: people with lung disease such as asthma, children and older adults, people who are active outdoors                                                       |
| <b>Unhealthy</b><br><b>[151–200]</b>                      | Active children and adults, and people with respiratory disease, such as asthma, should avoid prolonged outdoor exertion; everyone else, especially children, should limit prolonged outdoor exertion | The following groups should avoid prolonged or heavy outdoor exertion: people with lung disease such as asthma, children and older adults, people who are active outdoors. Everyone else should limit prolonged outdoor exertion |
| <b>Very unhealthy</b><br><b>[201–300]</b>                 | Active children and adults, and people with respiratory disease, such as asthma, should avoid all outdoor exertion; everyone else, especially children, should limit outdoor exertion                 | The following groups should avoid all outdoor exertion: people with lung disease such as asthma, children and older adults, people who are active outdoors. Everyone else should limit outdoor exertion                          |
| <b>Hazardous</b><br><b>[300+]</b>                         | Everyone should avoid all outdoor exertion                                                                                                                                                            |                                                                                                                                                                                                                                  |

\*For particles  $\leq 2.5$   $\mu\text{m}$  in diameter: an AQI of 100 corresponds to  $35 \mu\text{g m}^{-3}$  averaged over 24 hours). For particles  $\leq 10$   $\mu\text{m}$  in diameter: an AQI of 100 corresponds to  $150 \mu\text{g m}^{-3}$  averaged over 24 hours). An AQI of 100 for ozone corresponds to an ozone level of 0.075 parts per million (averaged over 8 hours).

#### SUPPLEMENTARY FIGURE 1 Air quality index and protection measures.

The AQI is an index for reporting daily air quality and is divided into six categories to help individuals understand when AP levels reach levels of health concern in their communities.

AP: air pollution; AQI: air quality index; EPA: Environmental Protection Agency;

PM<sub>2.5</sub>: particulate matter with an aerodynamic diameter  $<2.5 \mu\text{m}$ .
